# Supplementary material
Source: PubMed Central journal article supplement (PMC8281019)
Supplement: jamacardiol-e212321-s001.pdf [file jamacardiol-e212321-s001.pdf]

## Supplementary Online Content

Patel J, Pallazola VA, Dudum R, et al. Assessment of coronary artery calcium scoring to guide statin therapy allocation according to risk-enhancing factors: multi-ethnic study of atherosclerosis. *JAMA Cardiol*. Published online July 14, 2021. doi:10.1001/jamacardio.2021.2321

**eMethods.** Coronary Artery Calcium, Risk-Enhancing Factors Assessment, and Ascertainment of Incident ASCVD

**eTable 1.** Prevalence of CAC Among Those With ASCVD Risk-Enhancing Factors

**eTable 2.** Age-Standardized Prevalence of CAC According to Presence of ASCVD Risk-Enhancing Factors

**eTable 3.** Prevalence of Events and Unadjusted and Multivariable-Adjusted Hazard Ratios (95% CIs) for the Association of Risk-Enhancing Factors With Incident Cardiovascular Disease Stratified by Baseline Coronary Artery Calcium

**eTable 4.** Adjusted Area Under the Curve (AUC) for Different Models With 95% CIs for the Difference in Adjusted AUC for the Addition of Risk-Enhancing Factors and Coronary Artery Calcium (Modeled as Continuous and Binary) to Traditional Risk Factors

**eTable 5.** Reclassification of Incident Cardiovascular Disease Events With Addition of Risk-Enhancing Factors and Coronary Artery Calcium (Modeled as Continuous and Binary) to the Pooled Cohort Equations

**eFigure 1.** Derivation of Study Population

**eFigure 2.** Age-Standardized Distribution of CAC by Each Individual and Cumulative Risk-Enhancing Factors in the Overall Population

**eFigure 3.** Kaplan-Meier Survival Curves Free of ASCVD Events Among the Population by Risk-Enhancing Factor Burden According to CAC Groups

### eReferences

This supplementary material has been provided by the authors to give readers additional information about their work.

**eMethods.** Coronary Artery Calcium, Risk-Enhancing Factors Assessment, and Ascertainment of Incident ASCVD

***Coronary Artery Calcium***

At MESA visit 1 (baseline), CAC was quantified using the Agatston scoring method (1). CAC was measured either by electron-beam computed tomography or by multidetector row helical computed tomography, depending on the field center. Interobserver agreement ( $\kappa=0.93$ ) and intraobserver agreement ( $\kappa=0.90$ ) were high (2).

***Risk-Enhancing Factors Assessment***

A. Serum and urine laboratory data assessment

Biochemistry assays were performed on serum markers of lipids and lipid metabolism, systemic inflammation, insulin resistance, and on urinary markers of renal function at a central laboratory (University of Vermont, Burlington, VT, USA) (10). High-density lipoprotein cholesterol (HDL-C) level was measured using the cholesterol oxidase method. Low-density lipoprotein-cholesterol (LDL-C) was calculated using the Friedewald equation (3). High-Sensitivity C-reactive protein (hsCRP) was measured using the BNII nephelometer (N hs-CRP and N Antiserum to Human Fibrinogen; Dade Behring). Intra-assay and inter-assay coefficients of variation (CV) ranged from 2.3 to 4.4% and 2.1 to 5.7%, respectively (4).

The calculated LDL-C includes the cholesterol contained in lipoprotein(a) [Lp(a)]. As such, Lp(a) was subtracted [measured using a gradient gel electrophoresis by Health Diagnostics Laboratory (Richmond, VA)] from LDL-C. Lp(a) mass concentration was then measured by a latex-enhanced turbidimetric immunoassay (Denka Seiken, Tokyo, Japan) (5). Apolipoprotein B (ApoB) was measured at Health Diagnostics Laboratory Inc (Richmond, VA) using Roche reagents and a Roche modular-P analyzer (Roche Diagnostics; Indianapolis, IN). A random urine sample was obtained and analyzed centrally for creatinine [measured using colorimetry with a Johnson & Johnson Vitros 950 analyzer (Johnson & Johnson Clinical Diagnostics Inc.,

Rochester, NY)]; CV were  $\leq 2\%$ . Estimated glomerular filtration rate (eGFR) was calculated using the four-variable Modification of Diet in Renal Disease equation (6).

#### B. Anthropometric, demographic, medical history, and clinical variables

Age, sex, race/ethnicity, reproductive history, and lifestyle factors were ascertained using validated questionnaires. Body mass index (BMI) was calculated as the weight in kilograms divided by the height in meters squared. We used the National Cholesterol Education Program/Adult Treatment Panel III definition to classify participants with metabolic syndrome (7). Diabetes mellitus was defined using the 2003 American Diabetes Association criteria: fasting glucose  $\geq 126$  mg/dL or use of insulin or oral hypoglycemic medications (8).

Hypertension was defined according to the 2017 Guideline for High Blood Pressure in Adults ( $\geq 130$ -139 or 80-89 mm/Hg), or as a history of physician-diagnosed hypertension, or taking a medication for hypertension (9). Resting seated blood pressure was measured 3 times using a Dinamap automated oscillometric sphygmomanometer (model Pro 100; Critikon, Tampa, FL); an average of the final 2 measurements were used for analysis (10). ABI measurements were obtained with a Doppler probe in the bilateral brachial, dorsalis pedis, and posterior tibial arteries and a value calculated by the ratio of the highest ankle systolic blood pressure divided by the higher systolic blood pressure of the arms (11).

Women were asked if they had or were currently undergoing menopause, with age of onset and date of last menstruation information collected for those who answered 'Yes' (4). MESA participants at visit 2 reported on the presence or absence of FamHx defined as any first-degree relative (mother, father, siblings, or child) with coronary heart disease or heart attack or stroke occurring before the age of 55 years in males and 65 years in females, respectively.<sup>9</sup> Response options were "yes," "no," and "do not know." For the purposes of this analysis, "do not know" responses were counted as "no" responses (4).

### ***Ascertainment of Incident ASCVD***

ASCVD included hard coronary heart disease (CHD) events (myocardial infarction, resuscitated cardiac arrest, or CHD death), and fatal or non-fatal hemorrhagic or ischemic stroke, and transient ischemic attack (10).

**eTable 1.** Prevalence of CAC Among Those With ASCVD Risk-Enhancing Factors

| ASCVD RENF                                                                                                                                                                                                                                                                                                                                                                                                                                                                                                                                                                                                                                                                                                                             | Definition                               | Prevalence (n, %) |          |          | p-value |
|----------------------------------------------------------------------------------------------------------------------------------------------------------------------------------------------------------------------------------------------------------------------------------------------------------------------------------------------------------------------------------------------------------------------------------------------------------------------------------------------------------------------------------------------------------------------------------------------------------------------------------------------------------------------------------------------------------------------------------------|------------------------------------------|-------------------|----------|----------|---------|
|                                                                                                                                                                                                                                                                                                                                                                                                                                                                                                                                                                                                                                                                                                                                        |                                          | CAC=0             | CAC 1-99 | CAC ≥100 |         |
| FamHx                                                                                                                                                                                                                                                                                                                                                                                                                                                                                                                                                                                                                                                                                                                                  | Premature family history of ASCVD        | 99 (38)           | 91 (35)  | 68 (26)  | 0.21    |
| CKD, mL/min/1.73 m <sup>2</sup>                                                                                                                                                                                                                                                                                                                                                                                                                                                                                                                                                                                                                                                                                                        | EGFR 15–59                               | 72 (37)           | 69 (36)  | 53 (27)  | 0.22    |
| MetS*                                                                                                                                                                                                                                                                                                                                                                                                                                                                                                                                                                                                                                                                                                                                  | Require 3 out of 5 factors for diagnosis | 247 (42)          | 190 (32) | 157 (26) | 0.76    |
| Premature menopause                                                                                                                                                                                                                                                                                                                                                                                                                                                                                                                                                                                                                                                                                                                    | Menopause before age 40 y                | 34 (44)           | 24 (31)  | 19 (25)  | 0.96    |
| TG, mg/dL                                                                                                                                                                                                                                                                                                                                                                                                                                                                                                                                                                                                                                                                                                                              | ≥175                                     | 133 (40)          | 109 (33) | 87 (26)  | 0.62    |
| hs-CRP, mg/L                                                                                                                                                                                                                                                                                                                                                                                                                                                                                                                                                                                                                                                                                                                           | ≥2                                       | 369 (44)          | 262 (31) | 201 (24) | 0.29    |
| Lp(a), mg/dL                                                                                                                                                                                                                                                                                                                                                                                                                                                                                                                                                                                                                                                                                                                           | >50                                      | 180 (49)          | 105 (29) | 79 (22)  | 0.01†   |
| ApoB100, mg/dL                                                                                                                                                                                                                                                                                                                                                                                                                                                                                                                                                                                                                                                                                                                         | ≥130                                     | 307 (39)          | 257 (32) | 228 (29) | 0.003†  |
| ABI                                                                                                                                                                                                                                                                                                                                                                                                                                                                                                                                                                                                                                                                                                                                    | <0.9                                     | 10 (24)           | 8 (19)   | 24 (57)  | <0.001† |
| Combined Renf                                                                                                                                                                                                                                                                                                                                                                                                                                                                                                                                                                                                                                                                                                                          |                                          |                   |          |          |         |
| 0                                                                                                                                                                                                                                                                                                                                                                                                                                                                                                                                                                                                                                                                                                                                      |                                          | 70 (40)           | 60 (34)  | 45 (26)  | 0.37    |
| 1–2                                                                                                                                                                                                                                                                                                                                                                                                                                                                                                                                                                                                                                                                                                                                    |                                          | 310 (46)          | 203 (30) | 165 (24) |         |
| ≥3                                                                                                                                                                                                                                                                                                                                                                                                                                                                                                                                                                                                                                                                                                                                     |                                          | 45 (26)           | 165 (24) | 129 (27) |         |
| <p>*Defined when 3 of the following 5 factors are present: 1) waist circumference &gt;40 inches (men) or 35 inches (women); 2) triglycerides &gt;150 mg/dL; 3) blood pressure &gt;140/90 mmHg; 4) fasting blood glucose levels &gt;126 mg/dl; 5) high-density lipoprotein cholesterol &lt;40 mg/dL in men or &lt;50 in women mg/dL.</p> <p>† – Indicates significant results.</p> <p>ABI—ankle brachial index ASCVD—atherosclerotic cardiovascular disease; ApoB—apolipoprotein B; CAC—coronary artery calcium; CKD—chronic kidney disease; FamHx—family of history of premature ASCVD; hs-CRP—high sensitivity C-reactive protein; Lp(a)—lipoprotein(a); MetS—metabolic syndrome; RENF—risk-enhancing factor; TG – triglycerides.</p> |                                          |                   |          |          |         |

**eTable 2.** Age-Standardized Prevalence of CAC According to Presence of ASCVD Risk-Enhancing Factors

| ASCVD RENF                      | Definition                               | Overall (N = 1,688) | Females (N=712) |          |          | Males (N=976) |          |          |
|---------------------------------|------------------------------------------|---------------------|-----------------|----------|----------|---------------|----------|----------|
|                                 |                                          |                     | CAC=0           | CAC 1-99 | CAC ≥100 | CAC=0         | CAC 1-99 | CAC ≥100 |
| FamHx                           | Premature family history of ASCVD        | 19                  | 51              | 34       | 15       | 26            | 33       | 41       |
| CKD, mL/min/1.73 m <sup>2</sup> | EGFR 15–59                               | 11                  | 49              | 31       | 21       | 30            | 35       | 35       |
| MetS*                           | Require 3 out of 5 factors for diagnosis | 35                  | 52              | 29       | 19       | 31            | 34       | 35       |
| Premature menopause             | Menopause before age 40 y                | 5                   | 48              | 28       | 23       | —             | —        | —        |
| TG, mg/dL                       | ≥175                                     | 19                  | 51              | 31       | 18       | 29            | 35       | 36       |
| hs-CRP, mg/L                    | ≥2                                       | 49                  | 54              | 29       | 17       | 34            | 33       | 34       |
| Lp(a), mg/dL                    | >50                                      | 22                  | 54              | 29       | 17       | 45            | 27       | 28       |
| ApoB100, mg/dL                  | ≥130                                     | 47                  | 51              | 29       | 20       | 30            | 33       | 37       |
| ABI                             | <0.9                                     | 2                   | 34              | 32       | 34       | 23            | 5        | 72       |
| Combined RENF                   |                                          |                     |                 |          |          |               |          |          |
| 0                               |                                          | 13                  | 33              | 42       | 25       | 38            | 34       | 28       |
| 1–2                             |                                          | 51                  | 64              | 23       | 13       | 35            | 32       | 34       |
| ≥3                              |                                          | 36                  | 50              | 30       | 20       | 32            | 33       | 35       |

\*Defined when 3 of the following 5 factors are present: 1) waist circumference >40 inches (men) or 35 inches (women); 2) triglycerides >150 mg/dL; 3) blood pressure >140/90 mmHg; 4) fasting blood glucose levels >126 mg/dl; 5) high-density lipoprotein cholesterol <40 mg/dL in men or <50 in women mg/dL.

ABI—ankle brachial index ASCVD—atherosclerotic cardiovascular disease; ApoB—apolipoprotein B; CAC—coronary artery calcium; CKD—chronic kidney disease; FamHx—family of history of premature ASCVD; hs-CRP—high sensitivity C-reactive protein; Lp(a)—lipoprotein(a); MetS—metabolic syndrome; PM – premature menopause; RENF—risk-enhancing factor; TG – triglycerides.

**eTable 3.** Prevalence of Events and Unadjusted and Multivariable-Adjusted Hazard Ratios (95% CIs) for the Association of Risk-Enhancing Factors With Incident Cardiovascular Disease Stratified by Baseline Coronary Artery Calcium

|                             | CAC = 0 (N=722)      |                      | CAC 1-99 (N=532)                              |                                               | CAC ≥100 (N=434)     |                                               | Overall (N=1,688)   |                     |
|-----------------------------|----------------------|----------------------|-----------------------------------------------|-----------------------------------------------|----------------------|-----------------------------------------------|---------------------|---------------------|
|                             | Unadjusted           | Adjusted*            | Unadjusted                                    | Adjusted*                                     | Unadjusted           | Adjusted*                                     | Unadjusted          | Adjusted*           |
| <b>Individual RENE</b>      |                      |                      |                                               |                                               |                      |                                               |                     |                     |
| FamHx                       | 1.00<br>(0.41-2.41)  | 0.67<br>(0.26-1.71)  | 1.45<br>(0.68-3.10)                           | 1.45<br>(0.66-3.17)                           | 1.07<br>(0.51-2.25)  | 0.91<br>(0.41-2.03)                           | 1.12<br>(0.74-1.84) | 1.13<br>(0.71-1.80) |
| CKD (RENF)                  | 0.75<br>(0.23-2.42)  | 0.79<br>(0.23-2.65)  | 1.47<br>(0.68-3.15)                           | 1.39<br>(0.62-3.15)                           | 0.95<br>(0.43-2.10)  | 0.98<br>(0.44-2.20)                           | 1.10<br>(0.67-1.80) | 1.08<br>(0.65-1.80) |
| eGFR (per mL/min)           | 1.01<br>(0.99-1.03)  | 1.01<br>(0.98-1.03)  | 0.99<br>(0.97-1.01)                           | 0.99<br>(0.97-1.01)                           | 1.01<br>(0.99-1.03)  | 1.01<br>(0.99-1.03)                           | 1.00<br>(0.99-1.02) | 1.00<br>(0.99-1.02) |
| MetS                        | 0.94<br>(0.49-1.83)  | 0.64<br>(0.31-1.32)  | 1.70<br>(0.94-3.07)                           | 1.42<br>(0.74-2.73)                           | 1.51<br>(0.91-2.50)  | <b>1.84</b><br><b>(1.05-3.22)<sup>†</sup></b> | 1.37<br>(0.99-1.91) | 1.34<br>(0.94-1.91) |
| PM                          | 1.14<br>(0.28-4.73)  | 1.11<br>(0.25-4.87)  | 1.62<br>(0.50-5.22)                           | 1.33<br>(0.37-4.71)                           | 1.35<br>(0.42-4.31)  | 1.55<br>(0.43-5.56)                           | 1.32<br>(0.65-2.70) | 1.33<br>(0.63-2.81) |
| TG (RENF)                   | 0.77<br>(0.32-1.84)  | 0.46<br>(0.18-1.20)  | 0.87<br>(0.40-1.87)                           | 0.78<br>(0.35-1.75)                           | 1.15<br>(0.62-2.12)  | 1.25<br>(0.65-2.42)                           | 0.95<br>(0.63-1.45) | 0.86<br>(0.55-1.34) |
| TG (per mg/dL)              | 1.00<br>(0.99-1.01)  | 1.00<br>(0.99-1.00)  | 1.00<br>(0.99-1.01)                           | 1.00<br>(0.99-1.01)                           | 1.00<br>(0.99-1.01)  | 1.00<br>(0.99-1.01)                           | 1.00<br>(0.99-1.00) | 1.00<br>(0.99-1.00) |
| hsCRP (RENF)                | 1.32<br>(0.71-2.48)  | 1.36<br>(0.68-2.72)  | 1.01<br>(0.59-1.91)                           | 0.85<br>(0.45-1.59)                           | 1.12<br>(0.67-1.85)  | 0.98<br>(0.57-1.68)                           | 1.12<br>(0.81-1.55) | 1.06<br>(0.75-1.49) |
| hsCRP (per mg/L)            | 1.12<br>(0.85-1.47)  | 1.11<br>(0.81-1.51)  | 1.23<br>(0.94-1.60)                           | 1.12<br>(0.84-1.49)                           | 1.01<br>(0.82-1.25)  | 0.99<br>(0.79-1.24)                           | 1.10<br>(0.95-1.27) | 1.08<br>(0.93-1.26) |
| Lp(a) (RENF)                | 0.76<br>(0.35-1.65)  | 0.86<br>(0.38-1.92)  | 1.12<br>(0.54-2.33)                           | 1.26<br>(0.57-2.79)                           | 1.59<br>(0.89-2.85)  | 1.59<br>(0.87-2.91)                           | 1.07<br>(0.72-1.59) | 1.19<br>(0.79-1.80) |
| Lp(a) (per mg/dL)           | 0.88<br>(0.67-1.16)  | 0.97<br>(0.72-1.32)  | 1.02<br>(0.78-1.33)                           | 1.10<br>(0.80-1.50)                           | 1.07<br>(0.85-1.35)  | 1.06<br>(0.81-1.38)                           | 0.97<br>(0.84-1.13) | 1.04<br>(0.88-1.22) |
| ApoB100 (RENF)              | 1.32<br>(0.71-2.45)  | 1.42<br>(0.69-2.96)  | 0.60<br>(0.32-1.11)                           | 0.55<br>(0.25-1.22)                           | 1.00<br>(0.60-1.65)  | 1.09<br>(0.58-2.04)                           | 0.99<br>(0.71-1.37) | 1.10<br>(0.74-1.64) |
| ApoB100 (per mg/dL)         | 0.99<br>(0.98-1.01)  | 0.98<br>(0.95-1.01)  | 1.00<br>(0.99-1.02)                           | 1.02<br>(0.99-1.05)                           | 0.99<br>(0.98-1.01)  | 1.01<br>(0.99-1.03)                           | 1.00<br>(0.99-1.01) | 1.00<br>(0.99-1.02) |
| ABI (RENF)                  | 2.22<br>(0.30-16.12) | 2.76<br>(0.35-21.78) | 1.99<br>(0.27-14.46)                          | 2.24<br>(0.28-18.01)                          | 0.55<br>(0.13-2.27)  | 0.32<br>(0.07-1.36)                           | 1.25<br>(0.46-3.39) | 1.13<br>(0.41-3.10) |
| ABI (per 1 unit)            | 0.39<br>(0.01-10.34) | 0.23<br>(0.01-9.98)  | 0.038<br>(0.002-0.709)                        | 0.015<br>(0.001-0.392)                        | 1.47<br>(0.21-10.36) | 2.95<br>(0.40-21.66)                          | 0.42<br>(0.09-1.93) | 0.29<br>(0.06-1.44) |
| <b>Composite RENE</b>       |                      |                      |                                               |                                               |                      |                                               |                     |                     |
| 0                           | 1 (ref)              | 1 (ref)              | 1 (ref)                                       | 1 (ref)                                       | 1 (ref)              | 1 (ref)                                       | 1 (ref)             | 1 (ref)             |
| 1-2                         | 2.43<br>(0.57-10.36) | 1.82<br>(0.40-8.21)  | <b>0.29</b><br><b>(0.11-0.72)<sup>†</sup></b> | <b>0.25</b><br><b>(0.09-0.64)<sup>†</sup></b> | 0.88<br>(0.35-2.19)  | 0.80<br>(0.30-2.15)                           | 0.75<br>(0.43-1.30) | 0.72<br>(0.41-1.28) |
| ≥3                          | 2.01<br>(0.45-9.09)  | 1.15<br>(0.23-5.84)  | 0.70<br>(0.31-1.59)                           | 0.52<br>(0.20-1.36)                           | 1.01<br>(0.40-2.57)  | 0.88<br>(0.31-2.56)                           | 0.96<br>(0.55-1.68) | 0.87<br>(0.47-1.62) |
| Basic                       | 0.79<br>(0.42-1.46)  | 0.59<br>(0.30-1.15)  | 1.23<br>(0.67-2.25)                           | 1.03<br>(0.54-1.98)                           | 1.30<br>(0.78-2.19)  | 1.26<br>(0.72-2.22)                           | 1.12<br>(0.81-1.56) | 1.06<br>(0.75-1.50) |
| Advanced                    | 1.33<br>(0.59-3.01)  | 1.27<br>(0.52-3.06)  | <b>0.52</b><br><b>(0.28-0.96)<sup>†</sup></b> | <b>0.42</b><br><b>(0.21-0.85)<sup>†</sup></b> | 1.17<br>(0.64-2.12)  | 1.13<br>(0.57-2.21)                           | 0.88<br>(0.60-1.28) | 0.90<br>(0.60-1.35) |
| <b>Number of Events (n)</b> |                      |                      |                                               |                                               |                      |                                               |                     |                     |
| Total                       | 40                   |                      | 44                                            |                                               | 61                   |                                               | 145                 |                     |
| <b>Individual RENE</b>      |                      |                      |                                               |                                               |                      |                                               |                     |                     |
| FamHx                       | 9                    |                      | 9                                             |                                               | 9                    |                                               | 24                  |                     |
| CKD                         | 3                    |                      | 8                                             |                                               | 7                    |                                               | 18                  |                     |
| MetS                        | 13                   |                      | 21                                            |                                               | 26                   |                                               | 60                  |                     |
| PM                          | 2                    |                      | 3                                             |                                               | 3                    |                                               | 8                   |                     |
| TG                          | 6                    |                      | 8                                             |                                               | 13                   |                                               | 27                  |                     |
| hsCRP                       | 23                   |                      | 22                                            |                                               | 30                   |                                               | 75                  |                     |
| Lp(a)                       | 8                    |                      | 9                                             |                                               | 15                   |                                               | 32                  |                     |
| ApoB100                     | 20                   |                      | 16                                            |                                               | 32                   |                                               | 68                  |                     |
| ABI                         | 1                    |                      | 1                                             |                                               | 2                    |                                               | 4                   |                     |
| <b>Composite RENE</b>       |                      |                      |                                               |                                               |                      |                                               |                     |                     |
| 0                           | 2                    |                      | 9                                             |                                               | 6                    |                                               | 17                  |                     |
| 1-2                         | 21                   |                      | 9                                             |                                               | 20                   |                                               | 50                  |                     |
| ≥3                          | 11                   |                      | 16                                            |                                               | 17                   |                                               | 44                  |                     |
| Basic                       | 19                   |                      | 27                                            |                                               | 38                   |                                               | 84                  |                     |
| Advanced                    | 33                   |                      | 28                                            |                                               | 47                   |                                               | 108                 |                     |

\*Model is adjusted for age, sex, race/ethnicity, MESA site, education, hypertension, statin medication use, low-density lipoprotein cholesterol, cigarette smoking status.

† – Indicates significant results.

ABI—ankle brachial index ASCVD—atherosclerotic cardiovascular disease; ApoB—apolipoprotein B; CAC—coronary artery calcium; CKD—chronic kidney disease; eGFR—estimated glomerular filtration rate; FamHx—family history of premature ASCVD; hs-CRP—high sensitivity C-reactive protein; LDL-C—low-density lipoprotein cholesterol; Lp(a)—lipoprotein(a); MetS—metabolic syndrome; PM – premature menopause; RENF—risk-enhancing factor; TG – triglycerides; RENF—risk enhancing factor



**eTable 4.** Adjusted Area Under the Curve (AUC) for Different Models With 95% CIs for the Difference in Adjusted AUC for the Addition of Risk-Enhancing Factors and Coronary Artery Calcium (Modeled as Continuous and Binary) to Traditional Risk Factors

| <b>A. Modeled as Continuous</b>                                                                                                                                                                                                                                                                                                                                                                                                                                                                                                                                                                                                                                                                                                                                                                   |                    |                                |
|---------------------------------------------------------------------------------------------------------------------------------------------------------------------------------------------------------------------------------------------------------------------------------------------------------------------------------------------------------------------------------------------------------------------------------------------------------------------------------------------------------------------------------------------------------------------------------------------------------------------------------------------------------------------------------------------------------------------------------------------------------------------------------------------------|--------------------|--------------------------------|
|                                                                                                                                                                                                                                                                                                                                                                                                                                                                                                                                                                                                                                                                                                                                                                                                   | <b>C-statistic</b> | <b>95% Confidence Interval</b> |
| Traditional risk factors (base model)                                                                                                                                                                                                                                                                                                                                                                                                                                                                                                                                                                                                                                                                                                                                                             | 0.633              | –                              |
| FamHx                                                                                                                                                                                                                                                                                                                                                                                                                                                                                                                                                                                                                                                                                                                                                                                             | –                  | –                              |
| eGFR, mL/min/1.73 m <sup>2</sup>                                                                                                                                                                                                                                                                                                                                                                                                                                                                                                                                                                                                                                                                                                                                                                  | 0.633              | -0.006,0.005                   |
| MetS                                                                                                                                                                                                                                                                                                                                                                                                                                                                                                                                                                                                                                                                                                                                                                                              | –                  | –                              |
| Premature menopause                                                                                                                                                                                                                                                                                                                                                                                                                                                                                                                                                                                                                                                                                                                                                                               | –                  | –                              |
| TG, mg/dL                                                                                                                                                                                                                                                                                                                                                                                                                                                                                                                                                                                                                                                                                                                                                                                         | 0.637              | -0.008,0.011                   |
| hsCRP*, mg/L                                                                                                                                                                                                                                                                                                                                                                                                                                                                                                                                                                                                                                                                                                                                                                                      | 0.633              | -0.012,0.012                   |
| Lp(a)*, mg/dL                                                                                                                                                                                                                                                                                                                                                                                                                                                                                                                                                                                                                                                                                                                                                                                     | 0.638              | -0.002,0.012                   |
| ApoB100, mg/dL                                                                                                                                                                                                                                                                                                                                                                                                                                                                                                                                                                                                                                                                                                                                                                                    | 0.658              | -0.027,0.038                   |
| ABI                                                                                                                                                                                                                                                                                                                                                                                                                                                                                                                                                                                                                                                                                                                                                                                               | 0.641              | -0.006,0.030                   |
| PCE, ≥12%                                                                                                                                                                                                                                                                                                                                                                                                                                                                                                                                                                                                                                                                                                                                                                                         | 0.636              | -0.013,0.014                   |
| CAC, Agatston units                                                                                                                                                                                                                                                                                                                                                                                                                                                                                                                                                                                                                                                                                                                                                                               | 0.678              | <b>0.015,0.101</b>             |
| <p>Base model: age, sex, race/ethnicity, total cholesterol, high-density lipoprotein cholesterol, low-density lipoprotein cholesterol, systolic blood pressure, diabetes mellitus, antihypertensive medication use, cigarette-smoking status, statin medication use.</p> <p><b>BOLD</b> indicates significant results</p> <p>ABI—ankle brachial index ASCVD—atherosclerotic cardiovascular disease; ApoB—apolipoprotein B; CAC—coronary artery calcium; eGFR—estimated glomerular filtration rate; FamHx—family of history of premature ASCVD; hs-CRP—high sensitivity C-reactive protein; LDL-C—low-density lipoprotein cholesterol; Lp(a)—lipoprotein(a); MetS—metabolic syndrome; PM – premature menopause; PCE – Pooled Cohort Equations; RENF—risk-enhancing factor; TG – triglycerides.</p> |                    |                                |

| <b>B. Modeled as Binary</b>                                                                                                                                                                                                                                                                                                                                                                                                                                                                                                                                                                                                                                                                                                                                                                       |                    |                                |
|---------------------------------------------------------------------------------------------------------------------------------------------------------------------------------------------------------------------------------------------------------------------------------------------------------------------------------------------------------------------------------------------------------------------------------------------------------------------------------------------------------------------------------------------------------------------------------------------------------------------------------------------------------------------------------------------------------------------------------------------------------------------------------------------------|--------------------|--------------------------------|
|                                                                                                                                                                                                                                                                                                                                                                                                                                                                                                                                                                                                                                                                                                                                                                                                   | <b>C-statistic</b> | <b>95% Confidence Interval</b> |
| Traditional risk factors (base model)                                                                                                                                                                                                                                                                                                                                                                                                                                                                                                                                                                                                                                                                                                                                                             | 0.633              | –                              |
| FamHx                                                                                                                                                                                                                                                                                                                                                                                                                                                                                                                                                                                                                                                                                                                                                                                             | 0.613              | -0.025,0.020                   |
| eGFR, mL/min/1.73 m <sup>2</sup>                                                                                                                                                                                                                                                                                                                                                                                                                                                                                                                                                                                                                                                                                                                                                                  | 0.632              | -0.006,0.004                   |
| MetS                                                                                                                                                                                                                                                                                                                                                                                                                                                                                                                                                                                                                                                                                                                                                                                              | 0.642              | -0.009,0.027                   |
| Premature menopause                                                                                                                                                                                                                                                                                                                                                                                                                                                                                                                                                                                                                                                                                                                                                                               | 0.636              | -0.007,0.014                   |
| TG, mg/dL                                                                                                                                                                                                                                                                                                                                                                                                                                                                                                                                                                                                                                                                                                                                                                                         | 0.631              | -0.011,0.007                   |
| hsCRP*, mg/L                                                                                                                                                                                                                                                                                                                                                                                                                                                                                                                                                                                                                                                                                                                                                                                      | 0.633              | -0.002,0.002                   |
| Lp(a)*, mg/dL                                                                                                                                                                                                                                                                                                                                                                                                                                                                                                                                                                                                                                                                                                                                                                                     | 0.635              | -0.011,0.009                   |
| ApoB100, mg/dL                                                                                                                                                                                                                                                                                                                                                                                                                                                                                                                                                                                                                                                                                                                                                                                    | 0.634              | -0.002,0.003                   |
| ABI                                                                                                                                                                                                                                                                                                                                                                                                                                                                                                                                                                                                                                                                                                                                                                                               | 0.633              | -0.001,0.001                   |
| PCE ≥12%                                                                                                                                                                                                                                                                                                                                                                                                                                                                                                                                                                                                                                                                                                                                                                                          | 0.636              | -0.006,0.016                   |
| CAC, Agatston units                                                                                                                                                                                                                                                                                                                                                                                                                                                                                                                                                                                                                                                                                                                                                                               | 0.666              | -0.003,0.060                   |
| <p>Base model: age, sex, race/ethnicity, total cholesterol, high-density lipoprotein cholesterol, low-density lipoprotein cholesterol, systolic blood pressure, diabetes mellitus, antihypertensive medication use, cigarette-smoking status, statin medication use.</p> <p><b>BOLD</b> indicates significant results</p> <p>ABI—ankle brachial index ASCVD—atherosclerotic cardiovascular disease; ApoB—apolipoprotein B; CAC—coronary artery calcium; eGFR—estimated glomerular filtration rate; FamHx—family of history of premature ASCVD; hs-CRP—high sensitivity C-reactive protein; LDL-C—low-density lipoprotein cholesterol; Lp(a)—lipoprotein(a); MetS—metabolic syndrome; PM – premature menopause; PCE – Pooled Cohort Equations; RENF—risk-enhancing factor; TG – triglycerides.</p> |                    |                                |

**eTable 5.** Reclassification of Incident Cardiovascular Disease Events With Addition of Risk-Enhancing Factors and Coronary Artery Calcium (Modeled as Continuous and Binary) to the Pooled Cohort Equations

| <b>A. Modeled as Continuous</b>  |                            |            |                             |            |                                  |
|----------------------------------|----------------------------|------------|-----------------------------|------------|----------------------------------|
|                                  | % Reclassified to low risk |            | % Reclassified to high risk |            | NRI<br>(95% Confidence Interval) |
|                                  | Events                     | Non-events | Events                      | Non-events |                                  |
| Base Model (PCE)                 | –                          | –          | –                           | –          | –                                |
| FamHx                            | –                          | –          | –                           | –          | –                                |
| eGFR, mL/min/1.73 m <sup>2</sup> | 28.2                       | 61.5       | 15.5                        | 5.2        | 0.0005 (-0.0242,0.0252)          |
| MetS                             | –                          | –          | –                           | –          | –                                |
| Premature menopause              | –                          | –          | –                           | –          | –                                |
| TG, mg/dL                        | 30.5                       | 63.1       | 15.4                        | 5.2        | -0.0083 (-0.0164,-0.0002)        |
| hsCRP, mg/L                      | 28.8                       | 61.5       | 17.2                        | 5.4        | 0.006 (-0.025,0.038)             |
| Lp(a), mg/dL                     | 29.9                       | 63.5       | 15.3                        | 5.0        | 0.003 (-0.019,0.024)             |
| ApoB100, mg/dL                   | 34.1                       | 66.5       | 16.3                        | 5.2        | 0.010 (-0.008,0.027)             |
| ABI                              | 29.7                       | 63.7       | 17.3                        | 5.3        | 0.019 (-0.009,0.047)             |
| PCE ≥12%                         | 26.6                       | 60.1       | 15.0                        | 4.8        | 0.009 (-0.009,0.027)             |
| CAC, Agatston units              | 28.9                       | 65.7       | 18.9                        | 5.4        | <b>0.067 (0.018,0.116)</b>       |

**BOLD** indicates significant results  
 ABI—ankle brachial index; ASCVD—atherosclerotic cardiovascular disease; ApoB—apolipoprotein B; CAC—coronary artery calcium; eGFR—estimated glomerular filtration rate; FamHx—family of history of premature ASCVD; hs-CRP—high sensitivity C-reactive protein; Lp(a)—lipoprotein(a); MetS—metabolic syndrome; NRI – net reclassification index; PCE – Pooled Cohort Equations; RENF—risk-enhancing factor; TG – triglycerides.

| <b>B. Modeled as Binary</b>                                                                                                                                                                                                                                                                                                                                                                                                                                                          |                                   |                   |                                    |                   |                                          |
|--------------------------------------------------------------------------------------------------------------------------------------------------------------------------------------------------------------------------------------------------------------------------------------------------------------------------------------------------------------------------------------------------------------------------------------------------------------------------------------|-----------------------------------|-------------------|------------------------------------|-------------------|------------------------------------------|
|                                                                                                                                                                                                                                                                                                                                                                                                                                                                                      | <b>% Reclassified to low risk</b> |                   | <b>% Reclassified to high risk</b> |                   | <b>NRI<br/>(95% Confidence Interval)</b> |
|                                                                                                                                                                                                                                                                                                                                                                                                                                                                                      | <b>Events</b>                     | <b>Non-events</b> | <b>Events</b>                      | <b>Non-events</b> |                                          |
| Base Model (PCE)                                                                                                                                                                                                                                                                                                                                                                                                                                                                     | –                                 | –                 | –                                  | –                 | –                                        |
| FamHx                                                                                                                                                                                                                                                                                                                                                                                                                                                                                | 37.4                              | 68.9              | 13.7                               | 4.5               | -0.015 (-0.038,0.008)                    |
| eGFR, mL/min/1.73 m <sup>2</sup>                                                                                                                                                                                                                                                                                                                                                                                                                                                     | 30.3                              | 63.1              | 15.7                               | 5.2               | -0.003 (-0.008,0.002)                    |
| MetS                                                                                                                                                                                                                                                                                                                                                                                                                                                                                 | 27.0                              | 59.9              | 16.6                               | 5.5               | 0.004 (-0.033,0.042)                     |
| Premature menopause                                                                                                                                                                                                                                                                                                                                                                                                                                                                  | 29.3                              | 62.9              | 15.7                               | 5.2               | 0.006 (-0.010,0.022)                     |
| TG, mg/dL                                                                                                                                                                                                                                                                                                                                                                                                                                                                            | 30.4                              | 63.0              | 15.5                               | 5.2               | -0.006 (-0.021,0.010)                    |
| hsCRP, mg/L                                                                                                                                                                                                                                                                                                                                                                                                                                                                          | 28.2                              | 62.2              | 15.7                               | 5.1               | 0.010 (-0.016,0.037)                     |
| Lp(a), mg/dL                                                                                                                                                                                                                                                                                                                                                                                                                                                                         | 29.8                              | 62.1              | 16.3                               | 5.3               | -0.003 (-0.026,0.020)                    |
| ApoB100, mg/dL                                                                                                                                                                                                                                                                                                                                                                                                                                                                       | 30.4                              | 63.1              | 15.9                               | 5.2               | -0.001 (-0.007,0.005)                    |
| ABI                                                                                                                                                                                                                                                                                                                                                                                                                                                                                  | 30.2                              | 63.4              | 17.1                               | 5.2               | 0.017 (-0.001,0.035)                     |
| PCE ≥12%                                                                                                                                                                                                                                                                                                                                                                                                                                                                             | 26.6                              | 60.9              | 15.0                               | 4.8               | 0.009 (-0.009,0.027)                     |
| CAC, Agatston units                                                                                                                                                                                                                                                                                                                                                                                                                                                                  | 21.6                              | 53.9              | 16.1                               | 4.8               | 0.0001 (-0.0469,0.0471)                  |
| <p><b>BOLD</b> indicates significant results<br/> ABI—ankle brachial index; ASCVD—atherosclerotic cardiovascular disease; ApoB—apolipoprotein B; CAC—coronary artery calcium; eGFR—estimated glomerular filtration rate; FamHx—family of history of premature ASCVD; hs-CRP—high sensitivity C-reactive protein; Lp(a)—lipoprotein(a); MetS—metabolic syndrome; NRI – net reclassification index; PCE – Pooled Cohort Equations; RENF—risk-enhancing factor; TG – triglycerides.</p> |                                   |                   |                                    |                   |                                          |

**eFigure 1.** Derivation of Study Population

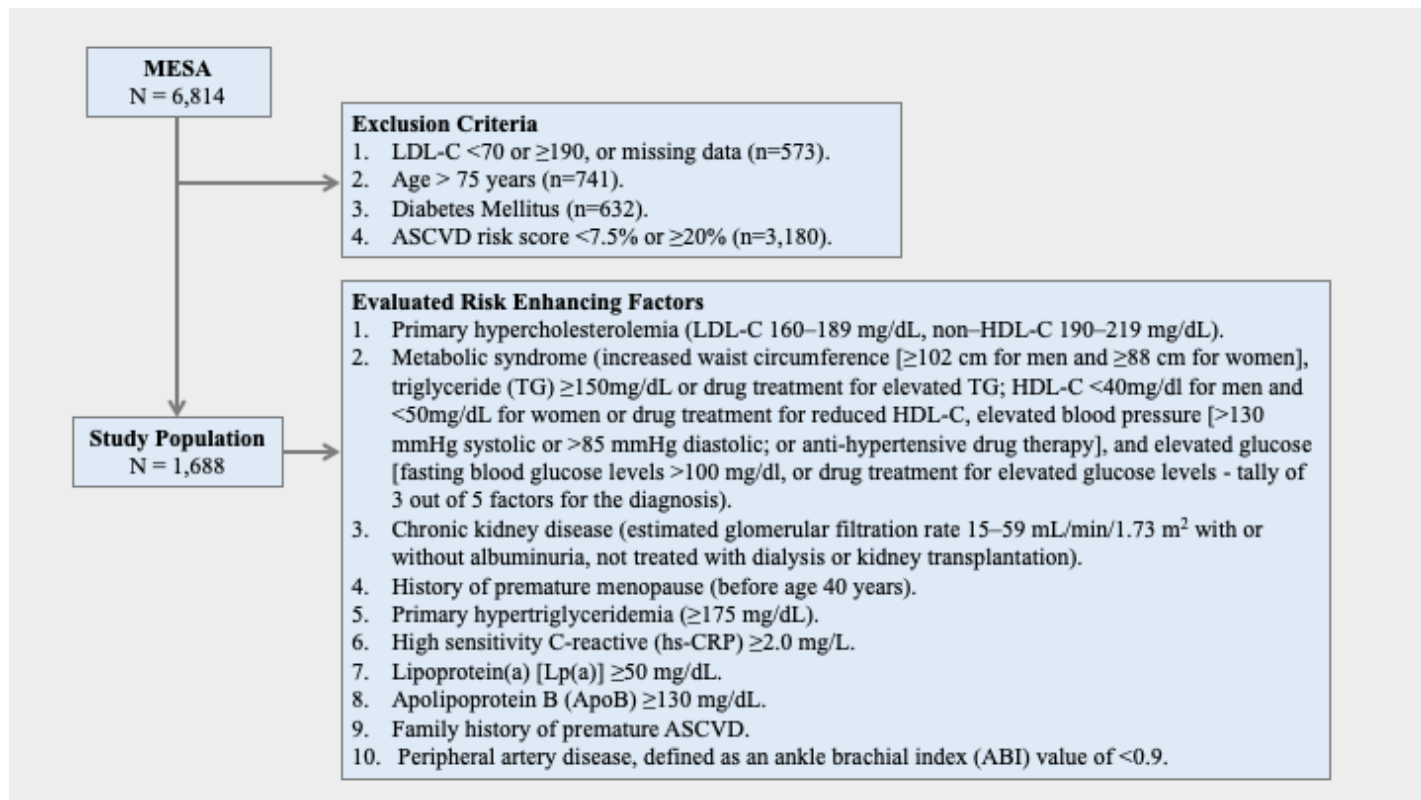

Flow chart depicting study population exclusion and inclusion criteria.

ASCVD – atherosclerotic cardiovascular disease; HDL-C: high-density lipoprotein cholesterol LDL-C—low-density lipoprotein cholesterol.

**eFigure 2.** Age-Standardized Distribution of CAC by Each Individual and Cumulative Risk-Enhancing Factors in the Overall Population

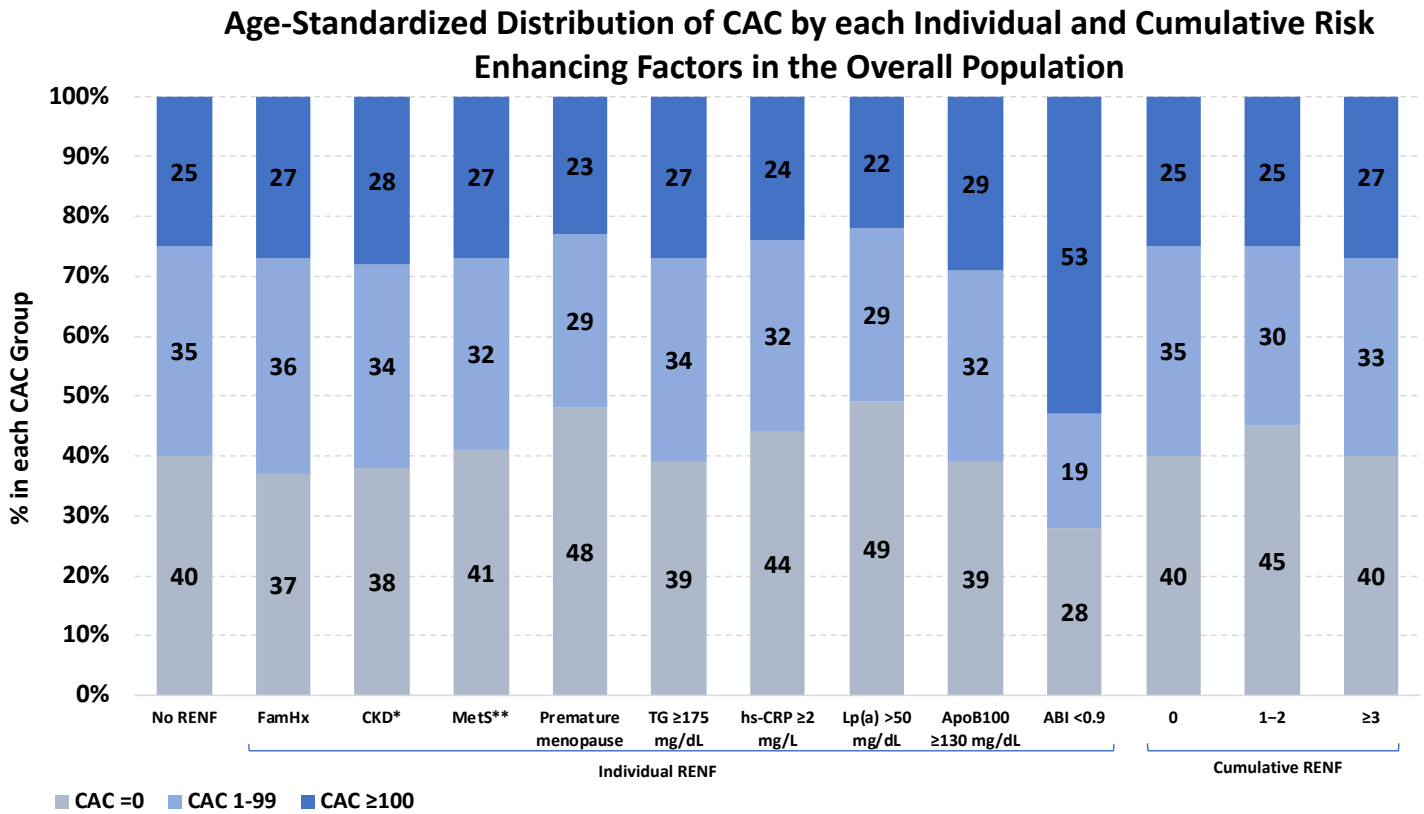

CAC scores at baseline across each individual and cumulative risk enhancing factor according the AHA/ACC Cholesterol Guidelines when standardized for age. The absence of CAC was 45% and 40% among those with 1-2 and ≥3 RENF, respectively.

\*eGFR 15-59 mL/min/1.73 m<sup>2</sup> \*\*Defined when 3 of the following 5 factors are present: 1) waist circumference >40 inches (men) or 35 inches (women); 2) triglycerides >150 mg/dL; 3) blood pressure >140/90 mmHg; 4) fasting blood glucose levels >126 mg/dl; 5) high-density lipoprotein cholesterol <40 mg/dL in men or <50 in women mg/dL.

ABI—ankle brachial index; Apo B—apolipoprotein B; CAC—coronary artery calcium; CKD—chronic kidney disease; hs-CRP—high sensitivity C-reactive protein; FamHx—family of history of premature ASCVD; Lp(a)—lipoprotein(a); MetS—metabolic syndrome; PM – premature menopause; TG – triglycerides.

**eFigure 3.** Kaplan-Meier Survival Curves Free of ASCVD Events Among the Population by Risk-Enhancing Factor Burden According to CAC Groups

Kaplan-Meier Survival Curves free of ASCVD Events Among the Population by RENF Burden According to CAC Groups

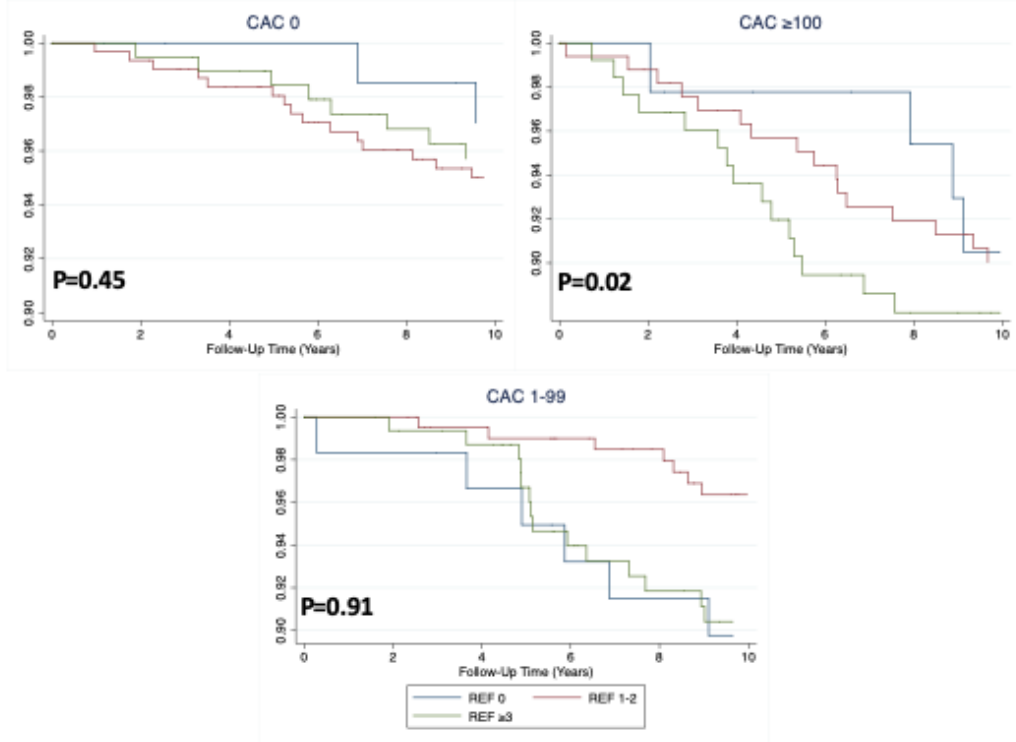

The fewest events were observed over a median 12 year follow up period was in those with CAC=0, irrespective of RENF burden.

ASCVD – atherosclerotic cardiovascular disease; CAC—coronary artery calcium; RENF – risk enhancing factor

## eReferences

1. Carr JJ, Nelson JC, Wong ND, et al. Calcified coronary artery plaque measurement with cardiac CT in population-based studies: standardized protocol of Multi-Ethnic Study of Atherosclerosis (MESA) and Coronary Artery Risk Development in Young Adults (CARDIA) study. *Radiology*. 2005;234(1):35-43. doi:10.1148/radiol.2341040439
2. Agatston AS, Janowitz WR, Hildner FJ, Zusmer NR, Viamonte M, Detrano R. Quantification of coronary artery calcium using ultrafast computed tomography. *J Am Coll Cardiol*. 1990;15(4):827-32. doi:10.1016/0735-1097(90)90282-t.
3. Friedewald WT, Levy RI, Fredrickson DS. Estimation of the concentration of low-density lipoprotein cholesterol in plasma, without use of the preparative ultracentrifuge. *Clin Chem*. 1972;18(6):499-502.
4. Bild DE, Bluemke DA, Burke GL, et al. Multi-Ethnic Study of Atherosclerosis: objectives and design. *Am J Epidemiol*. 2002;156(9):871-81. doi:10.1093/aje/kwf113
5. Marcovina SM, Albers JJ, Scanu AM, et al. Use of a reference material proposed by the International Federation of Clinical Chemistry and Laboratory Medicine to evaluate analytical methods for the determination of plasma lipoprotein(a). *Clin Chem*. 2000;46(12):1956-67.
6. Levey AS, Bosch JP, Lewis JB, Greene T, Rogers N, Roth D. A more accurate method to estimate glomerular filtration rate from serum creatinine: a new prediction equation. Modification of Diet in Renal Disease Study Group. *Ann Intern Med*. 1999;130(6):461-70. doi:10.7326/0003-4819-130-6-199903160-00002
7. National Cholesterol Education Program (NCEP) Expert Panel on Detection, Evaluation, and Treatment of High Blood Cholesterol in Adults (Adult Treatment Panel III). Third Report of the National Cholesterol Education Program (NCEP) Expert Panel on Detection, Evaluation, and Treatment of High Blood Cholesterol in Adults (Adult Treatment Panel III) final report. *Circulation*. 2002;106(25):3143-21.
8. American Diabetes Association. Diagnosis and classification of diabetes mellitus. *Diabetes Care*. 2006;29 Suppl 1:S43-48.
9. Whelton PK, Carey RM, Aronow WS, et al. 2017 ACC/AHA/AAPA/ABC/ACPM/AGS/APhA/ASH/ASPC/NMA/PCNA Guideline for the Prevention, Detection, Evaluation, and Management of High Blood Pressure in Adults: Executive Summary: A Report of the American College of Cardiology/American Heart Association Task Force on Clinical Practice Guidelines. *Circulation*. 2018;138(17):e426-e483. doi: 10.1161/CIR.0000000000000597.
10. Ramsey M. Blood pressure monitoring: automated oscillometric devices. *J Clin Monit*. 1991;7(1):56-67.



11. McDermott MM, Criqui MH, Liu K, et al. Lower ankle/brachial index, as calculated by averaging the dorsalis pedis and posterior tibial arterial pressures, and association with leg functioning in peripheral arterial disease. *J Vasc Surg*. 2000;32(6):1164-71. doi:10.1067/mva.2000.108640
